# Supplementary material for: Dt2Is a Gain-of-Function MADS-Domain Factor Gene That Specifies Semideterminacy in Soybean
Source: Oxford University Press journal article supplement (doi:10.1105/tpc.114.126938), 2014-07-01
Supplement: plcell_v26_7_2831_s1.zip [file plcell_v26_7_2831_s1.zip]

|               |            |     |          |       |            |      |         |       |     |        |        |      |      |
|---------------|------------|-----|----------|-------|------------|------|---------|-------|-----|--------|--------|------|------|
| AGL79         | MGRGRVQLRR | ENK | IRRQVTFS | KRRRT | TGLVKKAAQE | ISVL | CDAEVAL | IVFSP | HKG | LFEYS  | AGSSME |      |      |
| CAL           | MGRGRVQLKR | ENK | INRQVTFS | KRRRT | GLLKKAQE   | ISVL | CDAEVAL | IVFS  | HKG | LFEYS  | ES     | CME  |      |
| AP1           | MGRGRVQLKR | ENK | INRQVTFS | KRRRA | GLLKKAHE   | ISVL | CDAEVAL | VVFS  | HKG | LFEYS  | TD     | CME  |      |
| FUL           | MGRGRVQLKR | ENK | INRQVTFS | KRRRS | GLLKKAHE   | ISVL | CDAEVAL | IVFS  | SKG | LFEYS  | TD     | CME  |      |
| Glyma18g50910 | MGRGRVQLKR | ENK | TSQQVTFF | KRRS  | GLLKKASE   | ISVL | CDAQVAL | IIFST | KG  | LFEYS  | ERS    | ME   |      |
| Glyma01g08150 | MGRGRVQLKR | ENK | INRQVTFS | KRRRS | GLLKKAHE   | ISVL | CDAEVAL | IVFS  | HKG | LFEYAT | DS     | CME  |      |
| Glyma02g13420 | MGRGRVQLKR | ENK | INRQVTFS | KRRG  | GLLKKAHE   | ISVL | CDAEVAL | IIFSH | KG  | LFEYAT | DS     | CME  |      |
| Glyma05g07380 | MGRGRVQLKR | ENK | INRQVTFS | KRRRS | GLLKKARE   | ISVL | CDADVAL | IVFS  | TKG | L      | DYS    | NQP  | CTE  |
| Glyma06g22650 | MGRGRVQLKR | ENK | INRQVTFS | KRRS  | GLLKKAHE   | ISVL | CDAEVAL | IVFS  | TKG | LFEYS  | SD     | PCME |      |
| Glyma08g27680 | MGRGRVQLKR | ENK | TSQQVTFS | KRRS  | GLLKKAHE   | ISVL | CDAQVAL | IMFST | KG  | LFEYS  | ERS    | ME   |      |
| Glyma08g36380 | MGRGRVQLKR | ENK | INRQVTFS | KRRRA | GLLKKAHE   | ISVL | CDAEVAL | IVFS  | HKG | LFEYAT | DS     | CME  |      |
| Glyma16g13070 | MGRGRVQLKR | ENK | INRQVTFS | KRRRA | GLLKKAHE   | ISVL | CDAEVAL | IVFS  | HKG | LFEYAT | DS     | CME  |      |
| Glyma17g08890 | MGRGRVQLKR | ENK | INRQVTFS | KRRS  | GLLKKARE   | ISVL | CDADVAL | IVFS  | TKG | L      | DYS    | NE   | PCME |

**Supplemental Figure 1.** Alignment of predicted MADS-box domains of the *Dt2* candidate gene homologs in soybean and *Arabidopsis*.

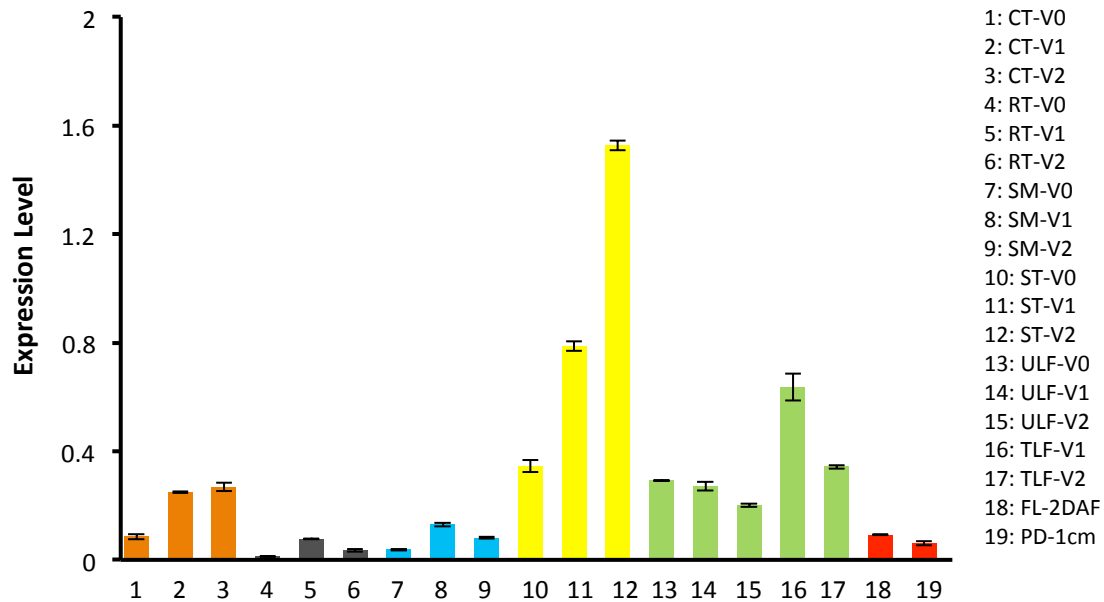

**Supplemental Figure 2.** Expression of the *Dt2* candidate genes in the semi-determinate soybean cultivar NE3001 detected by qRT-PCR. The y-axis indicates expression of *Dt2* relative to expression of *Cons4* in different tissues including cotyledon (CT), roots (RT), stems (SM), stem tips (ST), unifoliate leaflets (ULF), trifoliate leaflets (TLF), flowers (FL), and 1-cm immature pod (PD) at different developmental stages including V0 (when the cotyledons at node 0 are fully extended but the unifoliate leaflets at node 1 are not yet unrolled), V1 (unifoliate leaflets at node 1 fully expanded, but 1st trifoliate leaflets at node 2 not yet unrolled), and V2 (the first trifoliate leaflets have fully unrolled but 2<sup>nd</sup> trifoliate leaflets are still unrolled) stages as shown in x-axis. Expression levels were shown as means  $\pm$  standard errors of the means from four replicates.

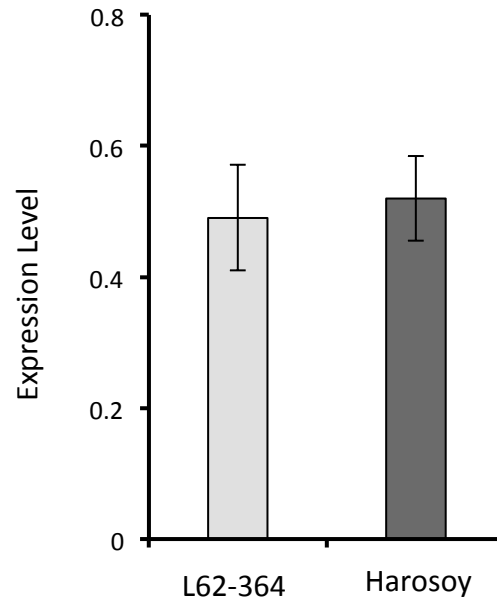

**Supplemental Figure 3.** Expression of *Glyma18g51000* in apical stem tips of NILs L62-364 and Harosoy at V2 stage detected by qRT-PCR. The y-axis indicates the expression levels of the gene relative to expression of *Cos4*. Expression levels were shown as means  $\pm$  standard errors of the means from four replicates.

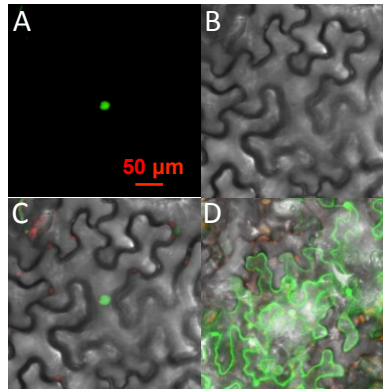

**Supplemental Figure 4.** Subcellular localization of the Dt2 protein in tobacco epidermal cells.

- (A) Subcellular localization of *Dt2*-GFP fusion gene under the control of 35S promoter as observed with a dark field for green fluorescence.
- (B) The same cell shown in (A) as observed with a bright field for the cell morphology.
- (C) The merged image of (A) and (B).
- (D) Subcellular localization of GFP protein as a control.

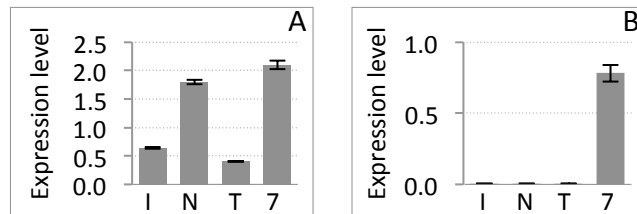

**Supplemental Figure 5.** Expression of endogenous *Dt2/dt2* and/or the transgene *Dt2* in parental and transgenic lines determined by qRT-PCR.

**(A)** Expression of *Dt2/dt2* relative to expression of *Cons4* in apical stem tips of IA3023 (I), NE3001 (N), Thorne (T), and a T3 Thorne *Dt2* transgenic plant as shown in Figure 3 at the V2 stage determined by qRT-PCR in . Expression levels were shown as means  $\pm$  standard errors of the means from four replicates.

**(B)** Expression of transgene *Dt2* relative to expression of *Cons4* in the same samples as shown in (A).

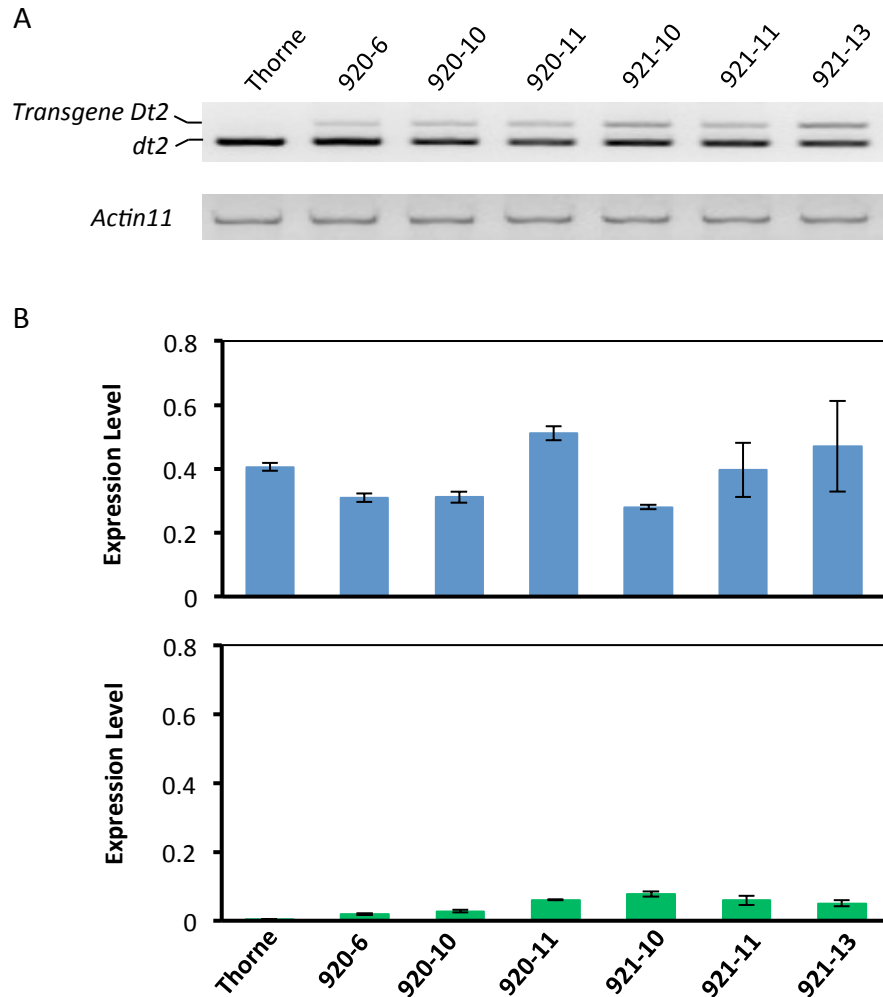

**Supplemental Figure 6.** Expression of Thorne endogenous *dt2* and the transgenic *Dt2* in the Pro-*Dt2*:CDS-*Dt2* transgenic lines determined by qRT-PCR. A. RT-PCR products of Thorne native *dt2* and transgenic *Dt2* amplified from Thorne and all six transgenic lines with a pair of *Dt2/dt2* specific primers. The small fragments were PCR products amplified from the native *dt2*, whereas the larger fragments were amplified from the transgene *Dt2* in six transgenic lines from distinct transformation events. Gene *Actin11* was used as a control. B. Expression of Thorne *dt2* and transgene *Dt2* relative to expression of *Cons4* detected by qRT-PCR with a pair of *Dt2/dt2* specific primers (top plot), and specific expression of the transgene *Dt2* relative to expression of *Cons4* detected by qRT-PCR with one primer from the coding sequence of *Dt2* and the other from pPTN1178 cassette.

**Supplemental Table 1.** Molecular markers used for mapping of the *Dt2* gene.

| Marker      | Chromosome ID | Forward primer sequences (5' to 3') | Reverse primer sequences (5' to 3') | Type of markers |
|-------------|---------------|-------------------------------------|-------------------------------------|-----------------|
| SSR_18_1791 | Gm18          | TGACCAGTCAATTGTTCAATTCTTT           | TTTACTCAACCATCTCCGCA                | SSR             |
| SSR_18_1807 | Gm18          | TCATTCTGTAAAATGAGTTGTGTATTC         | TTATTTTGCTTTCAAACCTTACAATTC         | SSR             |
| SSR_18_1817 | Gm18          | GTGAGGCCATCAATCACCTT                | CGCAAGAAGAAAAGAAAAGGAA              | SSR             |
| SSR_18_1821 | Gm18          | GGTGCCTTTAATTTCTTTGGA               | ATTCACCAGATCATGTGCCA                | SSR             |
| SSR_18_1822 | Gm18          | AATTTGATGCACTTGATAACGA              | TGACAAACACAAGAACTCACACA             | SSR             |
| SSR_18_1825 | Gm18          | GAATCCACCATCACCAAACC                | CAATGGCAACCCAGTAAGGT                | SSR             |
| SSR_18_1831 | Gm18          | TGTTTTTGTTAAATCTTTTGTTTGG           | TGTGTATGTTTGTGTGTGCACTT             | SSR             |
| SSR_18_1833 | Gm18          | GGCTATTGCAACATTCGGTT                | GAGGAAAGTGTTCAATTGCCG               | SSR             |
| SSR_18_1838 | Gm18          | TTCTATATTCAAACCTGAACTGAACTG         | AACTTATTATAACGCAATTTTATGCTT         | SSR             |
| SSR_18_1842 | Gm18          | TGAAATGGAGGAGAAAATGGA               | GTCCGGGGAAACTGAACC                  | SSR             |
| SSR_18_1846 | Gm18          | CTTTTAACGATTGGGTTGGG                | CTTCGGCCTTAGACTTTTCG                | SSR             |
| SSR_18_1854 | Gm18          | GCCACCTCTACACCAACACA                | TGACCAACAATGGCTTTCAA                | SSR             |
| SSR_18_1858 | Gm18          | TAGCTTTATAATGAGTGTGATAGAT           | GTATGCAAGGGATTAATTAAG               | SSR             |
| SSR_18_1864 | Gm18          | TGAATGATATATGTTTTGCGAAGA            | CAATAGAGCCGGATGGATGT                | SSR             |

|             |      |                             |                             |      |
|-------------|------|-----------------------------|-----------------------------|------|
| SSR_18_1890 | Gm18 | TGTTAGTGTACGCGTTACAAAATATAA | AAAGTGCATGTACATTAGTGAATTTTA | SSR  |
| SSR_18_1926 | Gm18 | TTTGAGATTACTGACAAAAGAGA     | TTTTGTCCCTTAAAATAACTTCAAC   | SSR  |
| SNP1        | Gm18 | CTCTGTAATATGCTCAGAGTC       | GTAGGTGGCAAGAAACCCCCC       | SNP  |
| SNP2        | Gm18 | CAGACATAATCTATGAACAAG       | GCAAACAACCTAAAGGATCACAG     | SNP  |
| SNP3        | Gm18 | CCATGTACATTAGTATTCAGTAG     | AGCAGCTCTGAAATTAGCC         | SNP  |
| SNP4        | Gm18 | GTGTTTATATTAGTTCTTTACCC     | ACCATGTATAAATGATAC          | SNP  |
| SNP5        | Gm18 | CAAGCACTATAGCCTTTAGTC       | AGAAGCATTCTTTGAAGAGGAAAC    | SNP  |
| SNP6        | Gm18 | TGAAGCGGATCGAGAACAAAACA     | AATGATGAACGAGTAGGAACCT      | CAPS |

---



**Supplemental Table 2.** Genes in the defined *Dt2* region according to the Williams 82 reference genome.

| <b>Genes</b>         | <b>Annotation</b>                                       |
|----------------------|---------------------------------------------------------|
| <i>Glyma18g50910</i> | MADS box transcription factor                           |
| <i>Glyma18g50920</i> | Uncharacterized conserved protein, contains RCC1 domain |
| <i>Glyma18g50930</i> | MEKK and related serine/threonine protein kinases       |
| <i>Glyma18g50940</i> | DSBA-like thioredoxin domain                            |
| <i>Glyma18g50950</i> | Ring finger protein 24-related                          |
| <i>Glyma18g50960</i> | No functional annotations                               |
| <i>Glyma18g50970</i> | Pollen proteins Ole e I like                            |
| <i>Glyma18g50980</i> | Glucosyl Transferases                                   |
| <i>Glyma18g50990</i> | F-box domain                                            |
| <i>Glyma18g51000</i> | F-box domain                                            |

**Supplemental Table 3.** Polymorphisms of a single nucleotide variant in the coding region of the *Dt2* candidate gene in a natural population previously described<sup>a</sup>

| Accessions | Genotype   | Phenotype     | Type                | Region       | Country      | Maturity Group | SNP |
|------------|------------|---------------|---------------------|--------------|--------------|----------------|-----|
| PI483464A  | <i>Dt1</i> | indeterminate | <i>Glycine soja</i> | Ningxia      | China        | III            | G   |
| PI 407301  | <i>Dt1</i> | indeterminate | <i>Glycine soja</i> | Jiangsu      | China        | V              | G   |
| PI 483465  | <i>Dt1</i> | indeterminate | <i>Glycine soja</i> | Shaanxi      | China        | V              | G   |
| PI468400A  | <i>Dt1</i> | indeterminate | <i>Glycine soja</i> | Ningxia      | China        | IV             | G   |
| PI 407131  | <i>Dt1</i> | indeterminate | <i>Glycine soja</i> | Kumamoto     | Japan        | VI             | G   |
| PI 447004  | <i>Dt1</i> | indeterminate | <i>Glycine soja</i> | Jilin        | China        | III            | G   |
| PI 366120  | <i>Dt1</i> | indeterminate | <i>Glycine soja</i> | Akita        | Japan        | IV             | G   |
| PI 407170  | <i>Dt1</i> | indeterminate | <i>Glycine soja</i> | Kyonggi      | Korea, South | V              | G   |
| PI 549046  | <i>Dt1</i> | indeterminate | <i>Glycine soja</i> | Shaanxi      | China        | III            | G   |
| PI 407140  | <i>Dt1</i> | indeterminate | <i>Glycine soja</i> | Kumamoto     | Japan        | VII            | A   |
| PI326582A  | <i>Dt1</i> | indeterminate | <i>Glycine soja</i> | Primorye     | Russia       | II             | A   |
| PI 464935  | <i>Dt1</i> | indeterminate | <i>Glycine soja</i> | Jiangsu      | China        | VI             | A   |
| PI 468916  | <i>Dt1</i> | indeterminate | <i>Glycine soja</i> | Liaoning     | China        | III            | A   |
| PI339871A  | <i>Dt1</i> | indeterminate | <i>Glycine soja</i> | Cheju        | Korea        | V              | A   |
| PI 458538  | <i>Dt1</i> | indeterminate | <i>Glycine soja</i> | Heilongjiang | China        | OOO            | A   |
| PI597459D  | <i>Dt1</i> | indeterminate | <i>Glycine soja</i> | Shandong     | China        | III            | A   |
| PI 393551  | <i>Dt1</i> | indeterminate | <i>Glycine soja</i> | Taiwan       | China        | X              | A   |
| PI597461A  | <i>Dt1</i> | indeterminate | <i>Glycine soja</i> | Shandong     | China        | IV             | A   |

|           |            |                 |                     |                |              |     |   |
|-----------|------------|-----------------|---------------------|----------------|--------------|-----|---|
| PI 562559 | <i>Dt1</i> | indeterminate   | <i>Glycine soja</i> | Cholla Puk     | Korea, South | V   | A |
| PI 407282 | <i>Dt1</i> | indeterminate   | <i>Glycine soja</i> | Cheju          | Korea, South | VI  | A |
| PI 548603 | <i>Dt1</i> | indeterminate   | N. Am. Ancestor     | Indiana        | USA          | IV  | G |
| PI 548488 | <i>Dt1</i> | indeterminate   | N. Am. Ancestor     | Missouri       | USA          | V   | G |
| PI 548311 | <i>Dt1</i> | indeterminate   | N. Am. Ancestor     | Ontario        | Canada       | O   | G |
| PI 548379 | <i>Dt1</i> | indeterminate   | N. Am. Ancestor     | Heilongjiang   | China        | O   | G |
| PI 548298 | <i>Dt1</i> | indeterminate   | N. Am. Ancestor     | Unknown        | China        | III | G |
| PI 548318 | <i>Dt1</i> | indeterminate   | N. Am. Ancestor     | Jilin          | China        | III | G |
| PI 548348 | <i>Dt1</i> | indeterminate   | N. Am. Ancestor     | Unknown        | China        | III | G |
| PI 548362 | <i>Dt1</i> | indeterminate   | N. Am. Ancestor     | Unknown        | Unknown      | III | G |
| PI 548391 | <i>Dt1</i> | indeterminate   | N. Am. Ancestor     | Liaoning       | China        | II  | A |
| FC 33243  | <i>Dt1</i> | indeterminate   | N. Am. Ancestor     | Unknown        | Unknown      | IV  | A |
| PI 548406 | <i>Dt1</i> | semideterminate | N. Am. Ancestor     | Jilin          | China        | II  | G |
| PI 548382 | <i>dt1</i> | semideterminate | N. Am. Ancestor     | Liaoning       | China        | OO  | G |
| PI 548485 | <i>dt1</i> | determinate     | N. Am. Ancestor     | Jiangsu        | China        | VII | A |
| PI 548477 | <i>dt1</i> | determinate     | N. Am. Ancestor     | Tennessee      | USA          | VI  | A |
| PI 548657 | <i>dt1</i> | determinate     | N. Am. Ancestor     | North Carolina | USA          | VII | G |
| PI 548445 | <i>dt1</i> | determinate     | N. Am. Ancestor     | Jiangsu        | China        | VII | G |
| PI 548456 | <i>dt1</i> | determinate     | N. Am. Ancestor     | Pyongyang      | Korea, North | VI  | A |

<sup>a</sup>Hyten DL, Song Q, Zhu Y, Choi IY, Nelson RL, Costa JM, Specht JE, Shoemaker RC, Cregan PB. (2006). Impacts of genetic bottlenecks on soybean genome diversity. Proc Natl Acad Sci USA. 103:16666-16671.

**Supplemental Table 4.** Phenotypic segregation for stem growth habit of the T3 progenies from individual T2 plants derived from nine independent transformation events

| <b>No. in<br/>Fig. 3</b> | <b>Transformation<br/>event</b> | <b>No. of positive T2<br/>plants<br/>planted in greenhouse</b> | <b>No. of semi-determinate<br/>T3 plants in the field</b> | <b>No. of<br/>indeterminate T3<br/>plants in the field</b> |
|--------------------------|---------------------------------|----------------------------------------------------------------|-----------------------------------------------------------|------------------------------------------------------------|
| 1                        | 917-70                          | 2                                                              | 4                                                         | 1                                                          |
| 2                        | 917-49                          | 2                                                              | 13                                                        | 1                                                          |
| 3                        | 913-15                          | 4                                                              | 19                                                        | 8                                                          |
| 4                        | 917-46                          | 4                                                              | 17                                                        | 3                                                          |
| 5                        | 917-56                          | 1                                                              | 6                                                         | 2                                                          |
| 6                        | 917-55                          | 1                                                              | 3                                                         | 1                                                          |
| 7                        | 917-66                          | 2                                                              | 12                                                        | 3                                                          |
| 8                        | 917-24                          | 1                                                              | 5                                                         | 2                                                          |
| 9                        | 917-65                          | 1                                                              | 6                                                         | 3                                                          |

**Supplemental Table 5.** Correlation between expression level of the transgenes and phenotypic variation among transgenic plants

| Phenotype         | Thorne | 913-15 | 917-49 | 917-46 | 917-24 | 917-70 | 917-56 | 917-55 | 917-65 | 917-66 | $r^a$                               | $p$                |
|-------------------|--------|--------|--------|--------|--------|--------|--------|--------|--------|--------|-------------------------------------|--------------------|
| Node number       | 21     | 10     | 13     | 15     | 15     | 15     | 16     | 17     | 20     | 21     | -0.842 <sup>**</sup> , <sup>b</sup> | 0.004 <sup>b</sup> |
| Expression Level  | 1      | 29.5   | 12.2   | 6.2    | 7.4    | 5.9    | 4.2    | 4.3    | 2      | 2.4    | -0.815 <sup>**</sup> , <sup>c</sup> | 0.007 <sup>c</sup> |
| Plant height (cm) | 82.4   | 26.1   | 33.6   | 39.6   | 40.1   | 41.9   | 42.1   | 42.5   | 55.2   | 57.8   |                                     |                    |

<sup>a</sup>Pearson's correlation coefficients were calculated using the SPSS statistics package

<sup>b</sup>Correlation between node numbers and expression levels of the transgene

<sup>c</sup>Correlation between plant heights and expression levels of the transgene

<sup>\*\*</sup>Correlation is significant at the 0.01 level (2-tailed)

**Supplemental Table 6.** Genes surrounding *Dt2* in soybean and their putative orthologs in *Medicago truncatula*

| Query genes in<br>soybean <sup>a</sup> | Putative orthologs in<br><i>Medicago</i> | BLASTP          |                     |                 |
|----------------------------------------|------------------------------------------|-----------------|---------------------|-----------------|
|                                        |                                          | Identity<br>(%) | Alignment<br>length | Expect<br>value |
| <i>Glyma18g50900</i>                   | <i>Medtr7g016600</i>                     | 82.03           | 256                 | 4.00E-118       |
| <i>Glyma18g50910 (Dt2)</i>             | <i>Medtr7g016630 (Mt-FULc)</i>           | 72.59           | 259                 | 1.00E-97        |
| <i>Glyma18g50920</i>                   | <i>Medtr7g016640</i>                     | 88.45           | 476                 | 0               |
| <i>Glyma18g50940</i>                   | <i>Medtr7g016650</i>                     | 85.38           | 212                 | 7.00E-108       |
| <i>Glyma18g50950</i>                   | <i>Medtr7g016840</i>                     | 76.99           | 226                 | 3.00E-102       |
| <i>Glyma18g50960</i>                   | <i>Medtr7g016900</i>                     | 82.78           | 790                 | 0               |
| <i>Glyma18g50970</i>                   | <i>Medtr7g016950</i>                     | 63.46           | 301                 | 1.00E-75        |
| <i>Glyma18g51040</i>                   | <i>Medtr7g016960</i>                     | 77.88           | 660                 | 0               |
| <i>Glyma18g51050</i>                   | <i>Medtr7g016970</i>                     | 70.07           | 441                 | 0               |
| <i>Glyma18g51060</i>                   | <i>Medtr7g017100</i>                     | 78.02           | 2384                | 0               |

<sup>a</sup>Protein sequences of 40 genes flanking *Dt2* (20 upstream of *Dt2* and 20 downstream of *Dt2*) in the soybean reference genome were used to search against the protein sequences of all genes annotated in the *Medicago truncatula* genome by BLASTP
